# Supplementary material for: Dielectric Properties Investigation of Metal–Insulator–Metal (MIM) Capacitors
Source: MDPI journal article supplement (doi:10.3390/molecules27123951), 2022-06-20
Supplement: s1 [file s1]

Supporting Information

# Dielectric properties investigation of metal-insulator-metal (MIM) capacitors

Li Xiong<sup>1</sup>, Jin Hu<sup>1</sup>, Zhao Yang<sup>2,3,\*</sup>, Hang Zhang<sup>4</sup> and Guanhua Zhang<sup>1,\*</sup>

<sup>1</sup>State Key Laboratory of Advanced Design and Manufacturing for Vehicle Body, College of Mechanical and Vehicle Engineering, Hunan University, Changsha 410082, China

<sup>2</sup>Guangdong Fenghua Advanced Technology Holding Co., Ltd., Zhaoqing, 526060, China

<sup>3</sup>State Key Laboratory of Advanced Material and Electronic Components, Zhaoqing, 526060, China

<sup>4</sup>Key Laboratory of Applied Surface and Colloid Chemistry, Ministry of Education, School of Chemistry and Chemical Engineering, Shaanxi Normal University, Xi'an 710119, P. R. China

\* Correspondence: authors: Yangzhao@china-fenghua.com (Z. Yang); guanhuaazhang@hnu.edu.cn (G. Zhang)

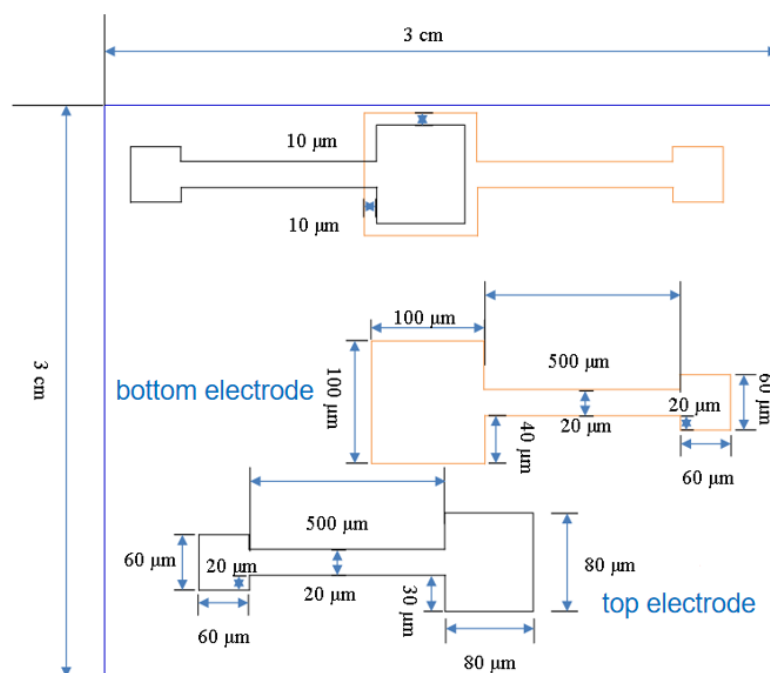

**Figure S1.** MIM capacitor electrode structure pattern design, arrange 30 unit patterns in a 3 cm × 3 cm area to form an array.

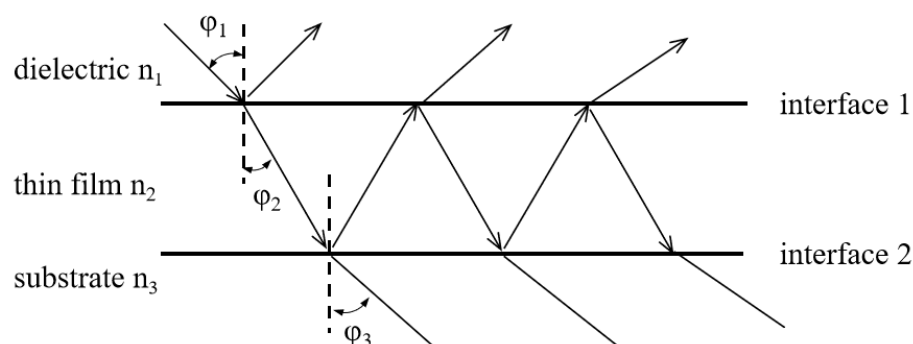

**Figure S2.** Reflection and refraction of light on thin film and substrate systems.

When a beam of light hits the film surface, multiple reflections and refractions are formed on the interface 1 and interface 2, and each reflected light and refracted light produce multi-beam interference respectively, whose interference results reflect the optical properties of the film. According to the law of refraction and reflection of light, combined with the Fresnel formula, the following relationship can be obtained as follows:

$$tg\varphi e^{i\Delta} = f(n_2, \varphi_1, n_3, d, \lambda) \quad (S1)$$

where  $\varphi_1$  is the incident angle,  $n_3$  is the refractive index of the substrate, and  $\lambda$  is the wavelength of the incident light, all of which are constants.  $\varphi$  and  $\Delta$  can be obtained through experimental tests. Ellipsometer is an optical testing technique used to analyze the reflection (or transmission) of light from the surface of a sample. Ellipsometer measures two important parameters ( $\varphi$ ,  $\Delta$ ), which represent the amplitude ratio  $\varphi$  and phase difference  $\Delta$  between p-polarized light and s-polarized light, respectively. The thickness of the test film is obtained by the law of refraction of light and the Fresnel formula. Call the Cauchy model in the ellipsometry spectrometer to compare with the experimental test data.

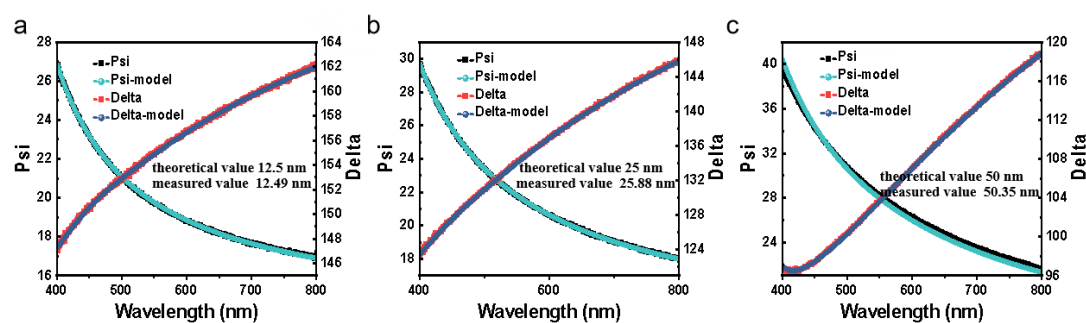

**Figure S3.** The dielectric capacitor thicknesses of 12.5 nm, 25 nm and 50 nm  $\text{Al}_2\text{O}_3$  are completed by ALD and measured with a spectroscopic ellipsometer. (a) 12.5 nm  $\text{Al}_2\text{O}_3$  dielectric film thickness test result. (b) 25 nm  $\text{Al}_2\text{O}_3$  dielectric film thickness test result. (c) 50 nm  $\text{Al}_2\text{O}_3$  dielectric film thickness test result.

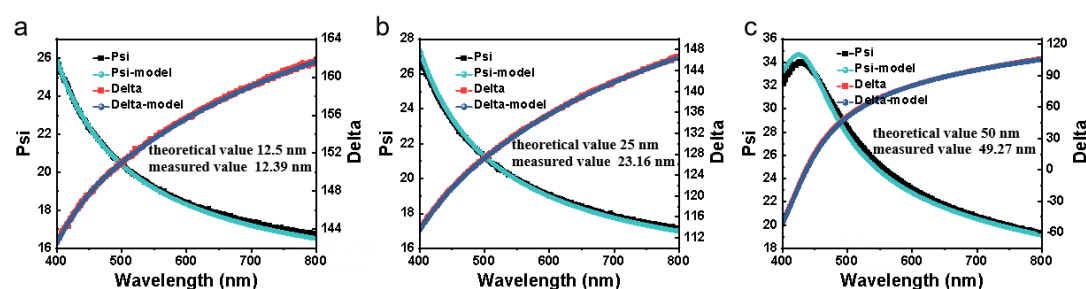

**Figure S4.** The dielectric capacitor thicknesses of 12.5 nm, 25 nm and 50 nm  $\text{TiO}_2$  are completed by ALD and measured with a spectroscopic ellipsometer. (a) 12.5 nm  $\text{TiO}_2$  dielectric film thickness test result. (b) 25 nm  $\text{TiO}_2$  dielectric film thickness test result. (c) 50 nm  $\text{TiO}_2$  dielectric film thickness test result.

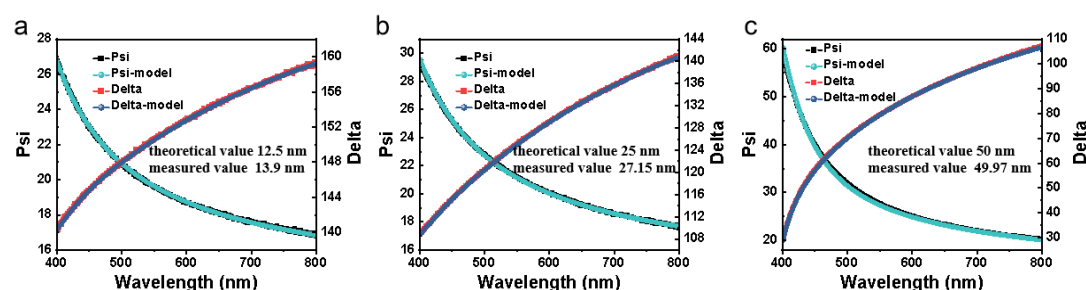

**Figure S5.** The dielectric capacitor thicknesses of 12.5 nm, 25 nm and 50 nm  $\text{HfO}_2$  are completed by ALD and measured with a spectroscopic ellipsometer. (a) 12.5 nm  $\text{HfO}_2$  dielectric film thickness test result. (b) 25 nm  $\text{HfO}_2$  dielectric film thickness test result. (c) 50 nm  $\text{HfO}_2$  dielectric film thickness test result.

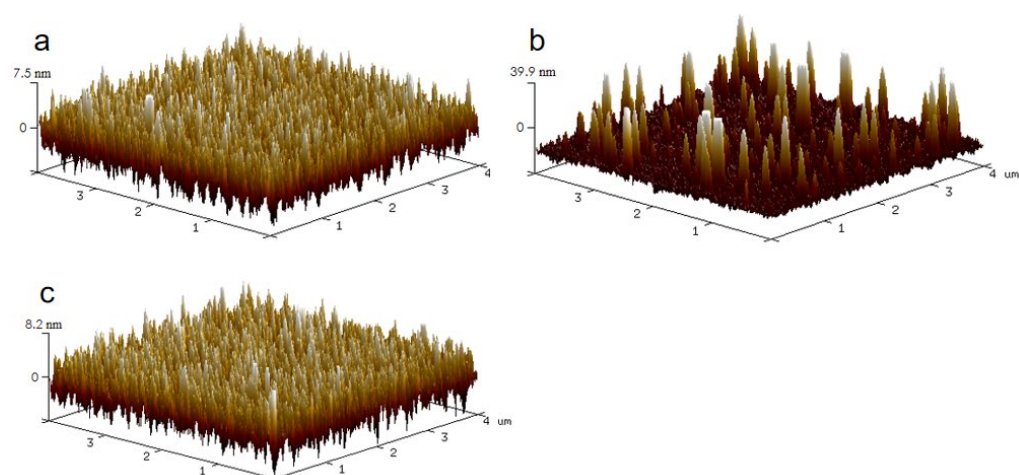

**Figure S6.** AFM images of MIM capacitors deposited with 12.5 nm  $\text{Al}_2\text{O}_3$ ,  $\text{TiO}_2$ ,  $\text{HfO}_2$  dielectric material, respectively. (a) ALD deposition of  $\text{Al}_2\text{O}_3$  dielectric material, (b) ALD deposition of  $\text{TiO}_2$  dielectric material, (c) ALD deposition of  $\text{HfO}_2$  dielectric material.

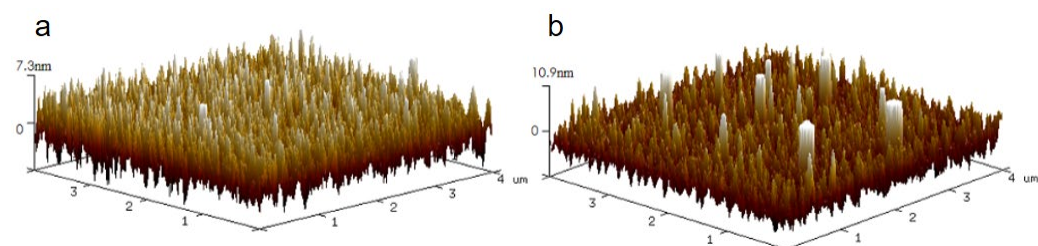

**Figure S7.** AFM images of MIM capacitors deposited with 50 nm  $\text{Al}_2\text{O}_3$ ,  $\text{TiO}_2$  dielectric material, respectively. (a) ALD deposition of  $\text{Al}_2\text{O}_3$  dielectric material, (b) ALD deposition of  $\text{TiO}_2$  dielectric material.
